# Supplementary material for: Monitoring compositional changes in Ni(OH)2electrocatalysts employed in the oxygen evolution reaction
Source: Royal Society of Chemistry journal article supplement (doi:10.1039/c9an01905g), 2019-01-01
Supplement: c9an01905g1.pdf [file c9an01905g1.pdf]

### Electronic Supplementary Information

The diffractogram of the electro-deposited nickel hydroxide film on a Au / SiO<sub>2</sub> substrate had a poor signal indicating the amorphous nature of the deposited film, with the largest observed line at 38° attributed to the underlying substrate (Figure S1).

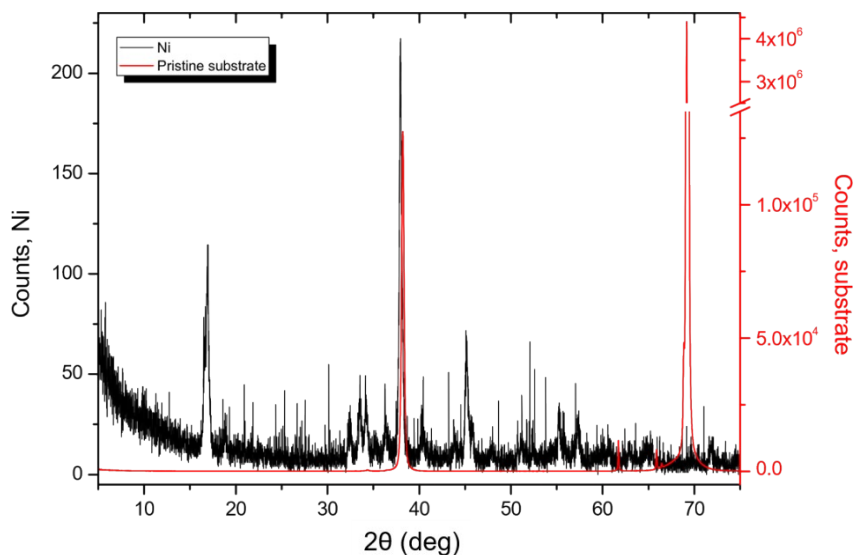

**Figure S1** X-ray diffractogram for electrodeposited nickel hydroxide film and underlying Au/SiO<sub>2</sub> substrate.

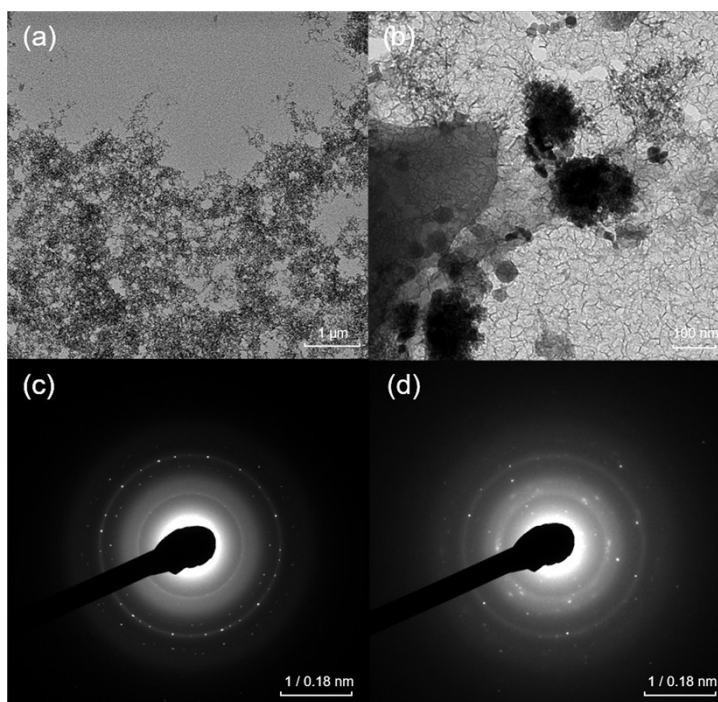

**Figure S2** TEM image of electrodeposited nickel hydroxide film on a TEM grid before (a) and after the OER (b). SAED pattern taken from a sample before (c) and after (d) the OER.
